# Supplementary material for: Advanced polymeric metal/metal oxide bionanocomposite using seaweedLaurencia dendroideaextract for antiprotozoal, anticancer, and photocatalytic applications
Source: PeerJ journal article supplement (doi:10.7717/peerj.15004), 2023-03-20

**Z-Average (d.nm):** 25.92  
**Pdi:** 0.090  
**Intercept:** 0.918  
**Result quality:** Good

| Size (d.nm):  | % Intensity: | St Dev (d.nm): |
|---------------|--------------|----------------|
| Peak 1: 25.92 | 100.0        | 481.6          |
| Peak 2: 0.000 | 0.0          | 0.000          |
| Peak 3: 0.000 | 0.0          | 0.000          |

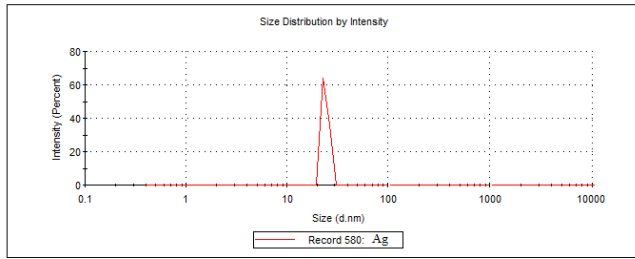

**Z-Average (d.nm):** 32.84  
**Pdi:** 0.149  
**Intercept:** 0.663  
**Result quality:** Good

| Size (d.nm):  | % Intensity: | St Dev (d.nm): |
|---------------|--------------|----------------|
| Peak 1: 32.15 | 100.0        | 45.26          |
| Peak 2: 0.000 | 0.0          | 0.000          |
| Peak 3: 0.000 | 0.0          | 0.000          |

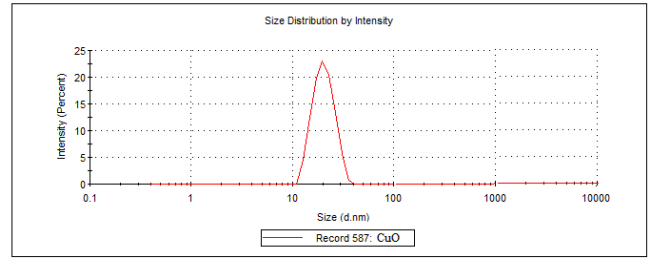

**Z-Average (d.nm):** 35.20  
**Pdi:** 0.061  
**Intercept:** 0.925  
**Result quality:** Good

| Size (d.nm):  | % Intensity: | St Dev (d.nm): |
|---------------|--------------|----------------|
| Peak 1: 35.20 | 100.0        | 45.06          |
| Peak 2: 0.000 | 0.0          | 0.000          |
| Peak 3: 0.000 | 0.0          | 0.000          |

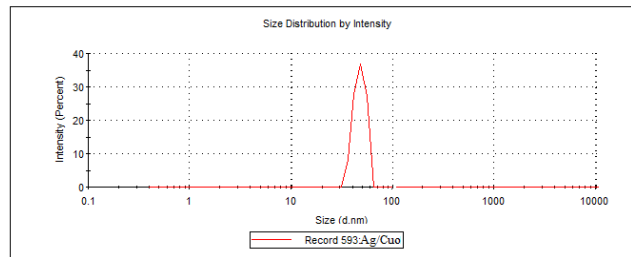

Supplement: DSL_Spectra_as_supporting_figure.pdf [file DSL_Spectra_as_supporting_figure.pdf]
